# Supplementary material for: Mapping the working route of phosphate monoester hydrolysis catalyzed by copper based models with special emphasis on the role of oxoanions by experimental and theoretical studies
Source: Royal Society of Chemistry journal article supplement (doi:10.1039/c8nj04018d), 2019-01-01
Supplement: c8nj04018d1.pdf [file c8nj04018d1.pdf]

## Supporting Information

### Mapping the working route of phosphate monoester hydrolysis catalyzed by copper based models with special emphasis on the role of oxoanions by experimental and theoretical studies

Sanchari Dasgupta,<sup>a</sup> Gabriel Aullón,<sup>\*b</sup> Ennio Zangrando<sup>c</sup> and Debasis Das<sup>\*a</sup>

<sup>a</sup>Department of Chemistry, University of Calcutta, 92 A.P.C Road, Kolkata:700009, India

<sup>b</sup>Departament de Química Inorgànica i Orgànica (Secció de Química Inorgànica) and Institut de Química Teòrica i Computacional, Universitat de Barcelona, Martí i Franques 1-11, 08028 Barcelona, Spain

<sup>c</sup>Department of Chemical and Pharmaceutical Sciences, University of Trieste, Via L. Giorgieri 1, 34127 Trieste, Italy

#### Contents of Supporting Information

- 1) **Fig. S1** FT-IR spectrum of complex **2**
- 2) **Fig. S2** FT-IR spectrum of complex **3**
- 3) **Fig. S3** UV-Vis spectra of complexes **2** and **3** in DMF medium
- 4) **Table S1** Coordination Bond Lengths (Å) and Angles (°) for Complex **2**
- 5) **Table S2** Coordination Bond Lengths (Å) and Angles (°) for Complex **3**
- 6) **Fig. S4** Intramolecular and Intermolecular H-bonding interactions operative between two tetranuclear units of complex **2**
- 7) **Fig. S5** Polymeric network of complex **2** viewed along crystallographic axis *a* propagated via H-bonding interactions
- 8) **Fig. S6** Intramolecular and intermolecular H-bonding interactions operative between two tetranuclear units of complex **3** via lattice water molecule
- 9) **Fig. S7** Polymeric network of complex **3** viewed along crystallographic axis *a* propagated via H-bonding interactions
- 10) **Fig. S8** ESI-MS spectrum of complex **2** in acetonitrile medium
- 11) **Fig. S9** ESI-MS spectrum of complex **3** in acetonitrile medium
- 12) **Fig. S10** Controlled experiment of Phosphatase activity for ligand H<sub>2</sub>L in 97.5% DMF-H<sub>2</sub>O mixture
- 13) **Fig. S11** Controlled experiment of Phosphatase activity for [Cu(ClO<sub>4</sub>)<sub>2</sub>] in 97.5% DMF-H<sub>2</sub>O mixture

- 14) **Fig. S12** Controlled experiment of Phosphatase activity for  $[\text{Cu}(\text{NO}_3)_2]$  in 97.5% DMF- $\text{H}_2\text{O}$  mixture
- 15) **Fig. S13** Controlled experiment of Phosphatase activity for  $[\text{Cu}(\text{OAc})_2]$  in 97.5% DMF- $\text{H}_2\text{O}$  mixture
- 16) **Table S3** First-order rate parameters for phosphatase activity as obtained by the non linear treatment of Michaelis-Menten treatment of complexes **1**, **2** and **3**
- 17) **Fig. S14** Plot of enzymatic kinetics of hydrolysis of 4-NPP for (a) complex **1**, (b) complex **2** and (c) complex **3**
- 18) **Fig. S15** ESI-MS spectrum of reaction mixture of complex **2** and 4-NPP recorded in positive mode
- 19) **Fig. S16** ESI-MS spectrum of reaction mixture of complex **3** and 4-NPP recorded in positive mode
- 20) **Table S4** Relative Gibbs Free Energies in DMF Solution for Compounds Involved in the Reaction Shown in the Scheme 2 Having Symmetrically Disposition of Bischelate Ligand L. The Energy for Initial Complexes is Arbitrarily Taken to Zero. All Energies are in kJ/mol
- 21) **Table S5** Main Geometric Parameters for the Optimized Binuclear Structures. Distances in Angstroms, Angles in Degrees
- 22) **Table S6** Continous Shape Measures (CSM) for Copper Atoms in the Computed Geometries Accross the Proposed Pathway
- 23) **Table S7** Crystallographic Data and Details of Refinements for Complexes **2** and **3**

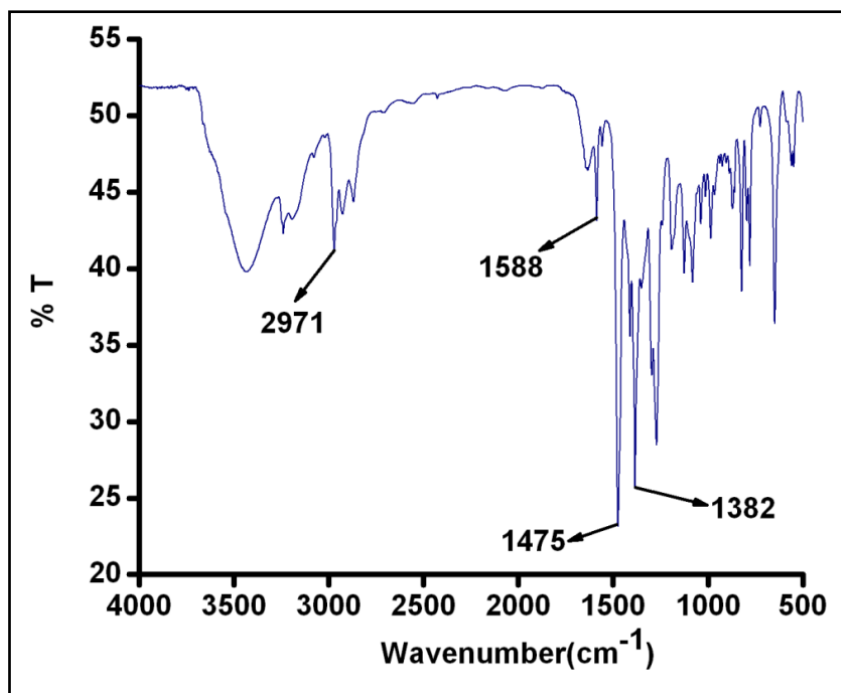

Fig. S1 FT-IR spectrum of complex 2.

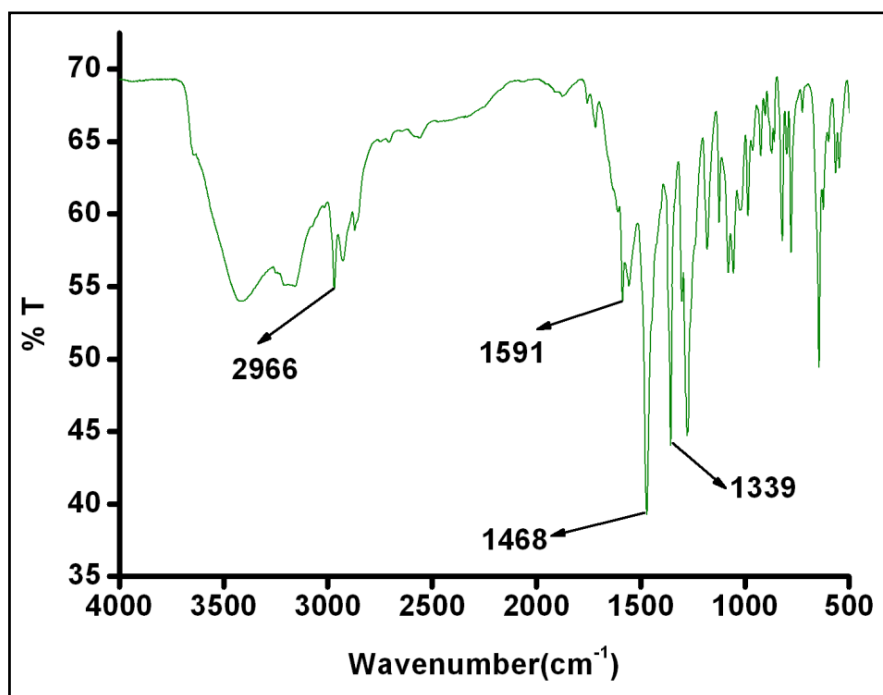

Fig. S2 FT-IR spectrum of complex 3.

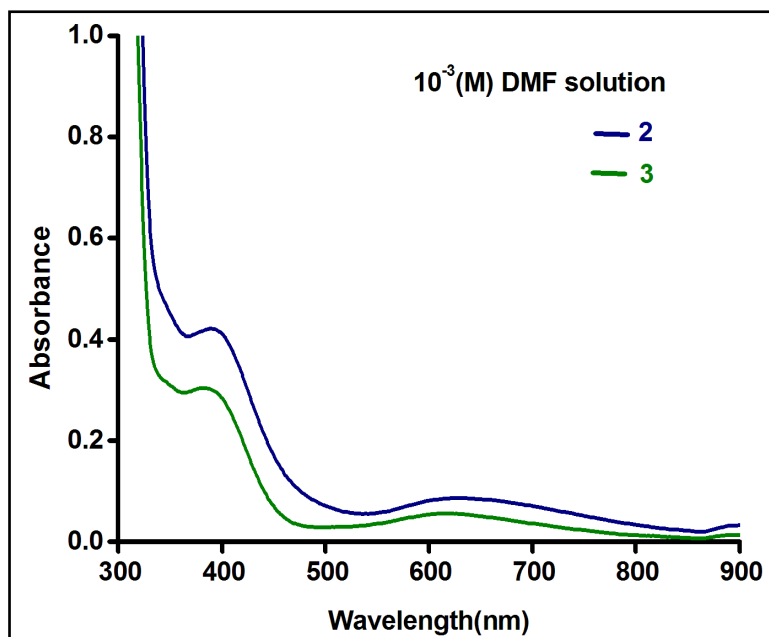

**Fig. S3** UV-Vis spectra of complexes **2** and **3** in DMF medium.

**Table S1** Coordination bond lengths (Å) and angles (°) for complex **2**

|             |            |              |          |
|-------------|------------|--------------|----------|
| Cu(1)-O(1)  | 1.921(5)   | Cu(2)-O(3)   | 1.907(5) |
| Cu(1)-N(1)  | 1.985(6)   | Cu(2)-N(2)   | 1.972(6) |
| Cu(1)-O(2)  | 1.973(5)   | Cu(2)-O(4)   | 1.926(5) |
| Cu(1)-O(4)  | 1.907(5)   | Cu(2)-O(1)   | 2.094(5) |
| Cu(1)-O(5)  | 2.355(7)   | Cu(2)-O(3')  | 2.172(5) |
| Cu(1)-Cu(2) | 2.9735(14) | Cu(2)-Cu(2') | 3.131(2) |

|                 |          |                  |          |
|-----------------|----------|------------------|----------|
| O(1)-Cu(1)-N(1) | 95.5(2)  | O(3)-Cu(2)-N(2)  | 96.5(2)  |
| N(1)-Cu(1)-O(2) | 84.4(2)  | N(2)-Cu(2)-O(4)  | 84.7(2)  |
| O(4)-Cu(1)-O(1) | 83.7(2)  | O(3)-Cu(2)-O(4)  | 178.5(2) |
| O(4)-Cu(1)-N(1) | 171.4(3) | O(3)-Cu(2)-O(3') | 79.9(2)  |
| O(4)-Cu(1)-O(2) | 95.3(2)  | O(4)-Cu(2)-O(3') | 98.6(2)  |
| O(1)-Cu(1)-O(2) | 173.0(2) | N(2)-Cu(2)-O(3') | 126.3(2) |
| O(1)-Cu(1)-O(5) | 92.0(3)  | O(3)-Cu(2)-O(1)  | 100.7(2) |
| O(2)-Cu(1)-O(5) | 95.0(3)  | O(4)-Cu(2)-O(1)  | 78.8(2)  |
| O(4)-Cu(1)-O(5) | 93.5(2)  | N(2)-Cu(2)-O(1)  | 141.1(2) |
| N(1)-Cu(1)-O(5) | 95.0(3)  | O(3')-Cu(2)-O(1) | 91.1(2)  |

Primed atoms at  $-x+1, -y, -z+1$

**Table S2** Coordination bond lengths (Å) and angles (°) for complex **3**.

|             |           |              |            |
|-------------|-----------|--------------|------------|
| Cu(1)-O(1)  | 1.927(3)  | Cu(2)-O(3)   | 1.925(3)   |
| Cu(1)-N(1)  | 1.983(4)  | Cu(2)-N(2)   | 1.997(4)   |
| Cu(1)-O(2)  | 2.013(3)  | Cu(2)-O(4)   | 1.928(3)   |
| Cu(1)-O(4)  | 1.905(3)  | Cu(2)-O(1)   | 2.061(3)   |
| Cu(1)-O(5)  | 2.279(4)  | Cu(2)-O(3')  | 2.214(3)   |
| Cu(1)-Cu(2) | 2.9936(8) | Cu(2)-Cu(2') | 3.1996(12) |

|                 |            |                  |            |
|-----------------|------------|------------------|------------|
| O(1)-Cu(1)-N(1) | 94.74(14)  | O(3)-Cu(2)-N(2)  | 95.25(14)  |
| N(1)-Cu(1)-O(2) | 84.18(14)  | N(2)-Cu(2)-O(4)  | 84.11(14)  |
| O(4)-Cu(1)-O(1) | 81.64(13)  | O(3)-Cu(2)-O(4)  | 179.36(13) |
| O(4)-Cu(1)-N(1) | 160.01(16) | O(3)-Cu(2)-O(3') | 78.95(13)  |
| O(4)-Cu(1)-O(2) | 97.67(14)  | O(4)-Cu(2)-O(3') | 101.39(13) |
| O(1)-Cu(1)-O(2) | 174.87(15) | N(2)-Cu(2)-O(3') | 124.61(14) |
| O(1)-Cu(1)-O(5) | 96.88(14)  | O(3)-Cu(2)-O(1)  | 102.81(13) |
| O(2)-Cu(1)-O(5) | 88.24(14)  | O(4)-Cu(2)-O(1)  | 77.73(13)  |
| O(4)-Cu(1)-O(5) | 101.80(14) | N(2)-Cu(2)-O(1)  | 142.72(15) |
| N(1)-Cu(1)-O(5) | 98.15(15)  | O(3')-Cu(2)-O(1) | 91.04(13)  |

Primed atoms at -x+1,-y+1,-z+1

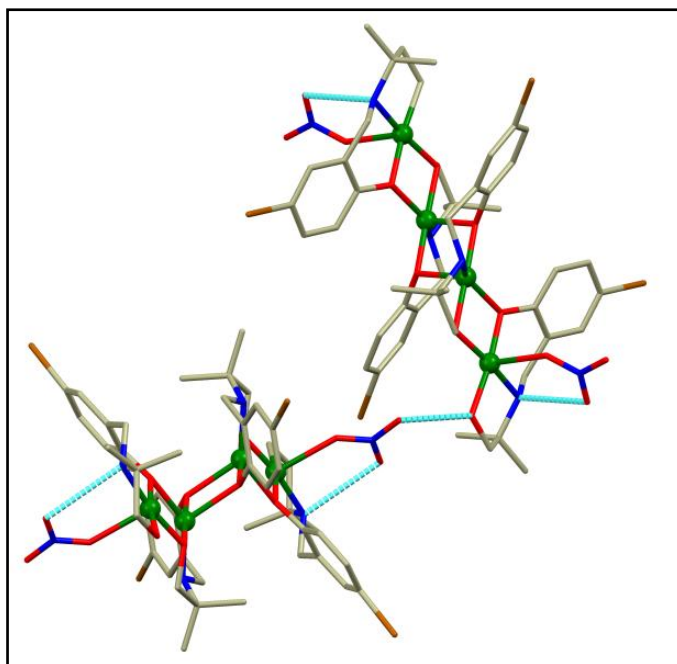

**Fig. S4** Intramolecular and Intermolecular H-bonding interactions operative between two tetranuclear units of complex **2**.

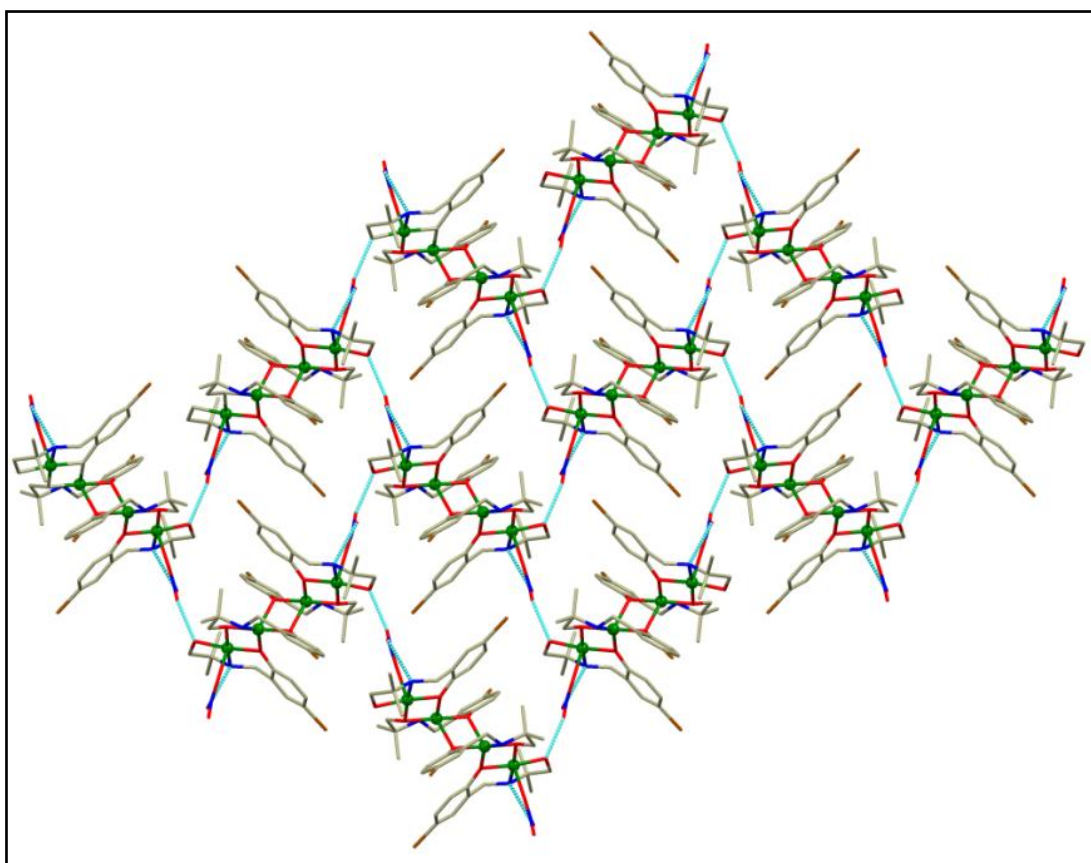

**Fig. S5** Polymeric network of complex **2** viewed along crystallographic axis *a* propagated via H-bonding interactions.

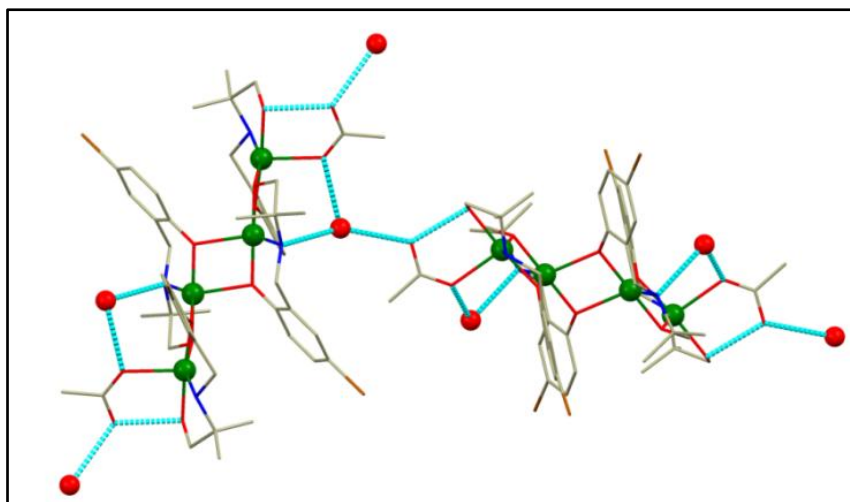

**Fig. S6** Intramolecular and intermolecular H-bonding interactions operative between two tetranuclear units of complex **3** via lattice water molecule.

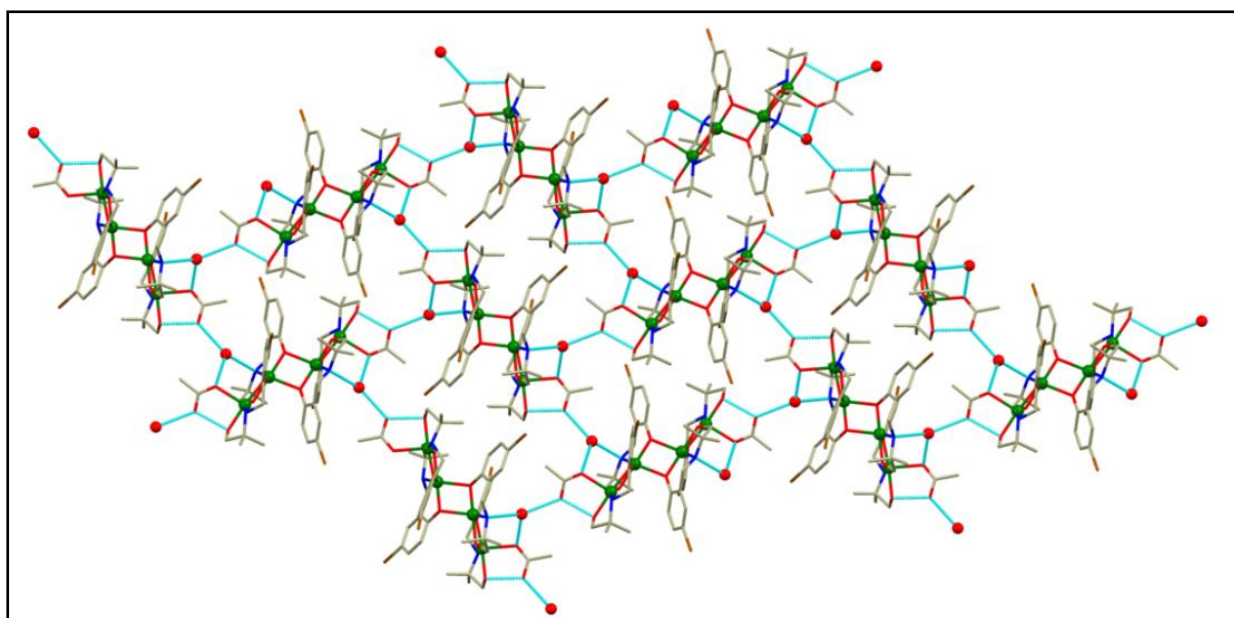

**Fig. S7** Polymeric network of complex **3** viewed along crystallographic axis *a* propagated via H-bonding interactions.

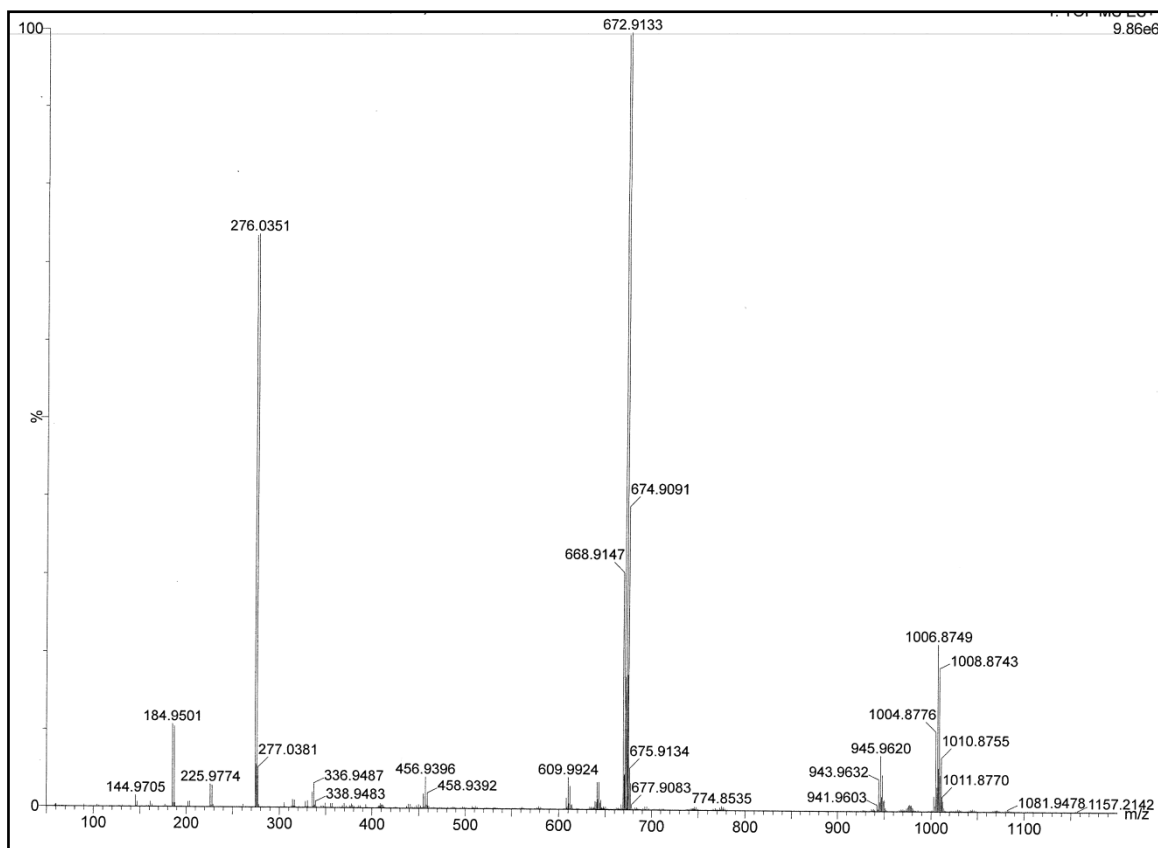

**Fig. S8** ESI-MS spectrum of complex **2** in acetonitrile medium.

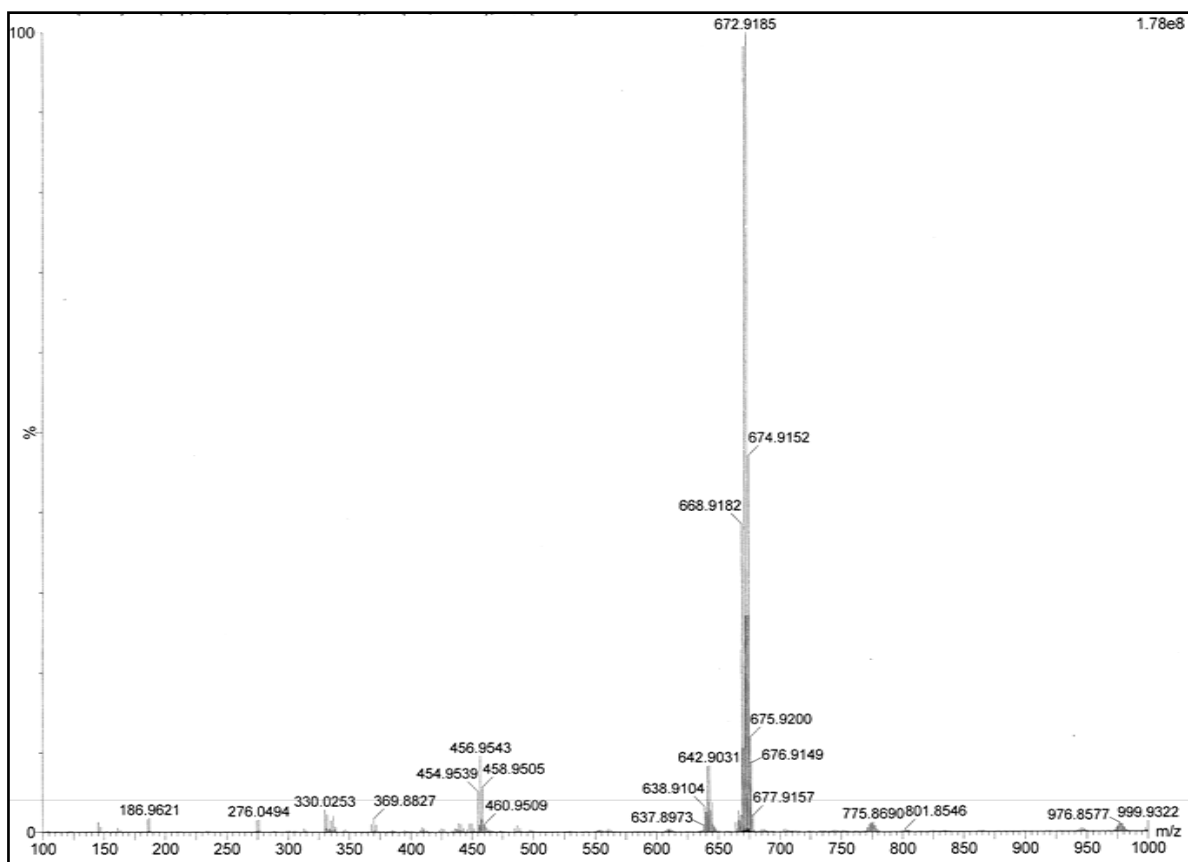

**Fig. S9** ESI-MS spectrum of complex **3** in acetonitrile medium.



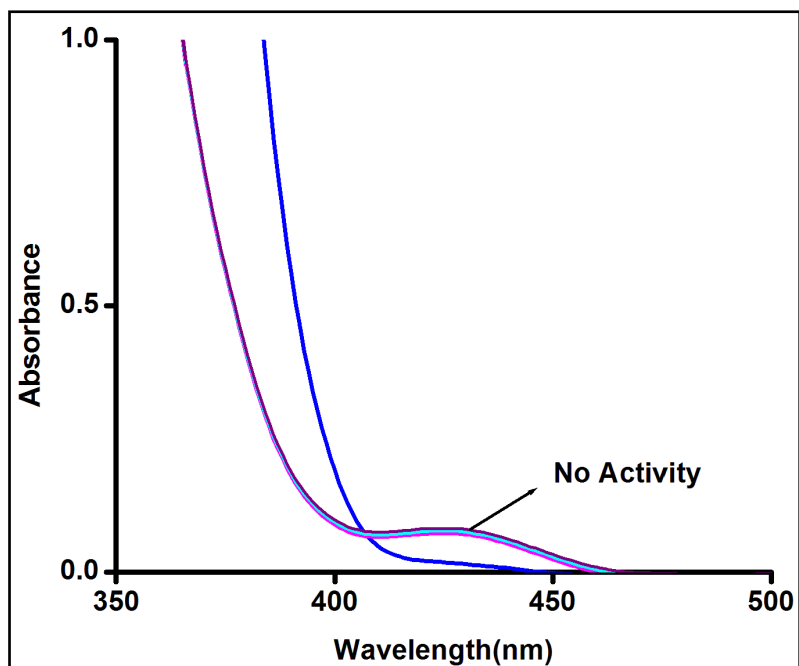

**Fig. S10** Controlled experiment of Phosphatase activity for ligand  $H_2L$  in 97.5% DMF- $H_2O$  mixture.

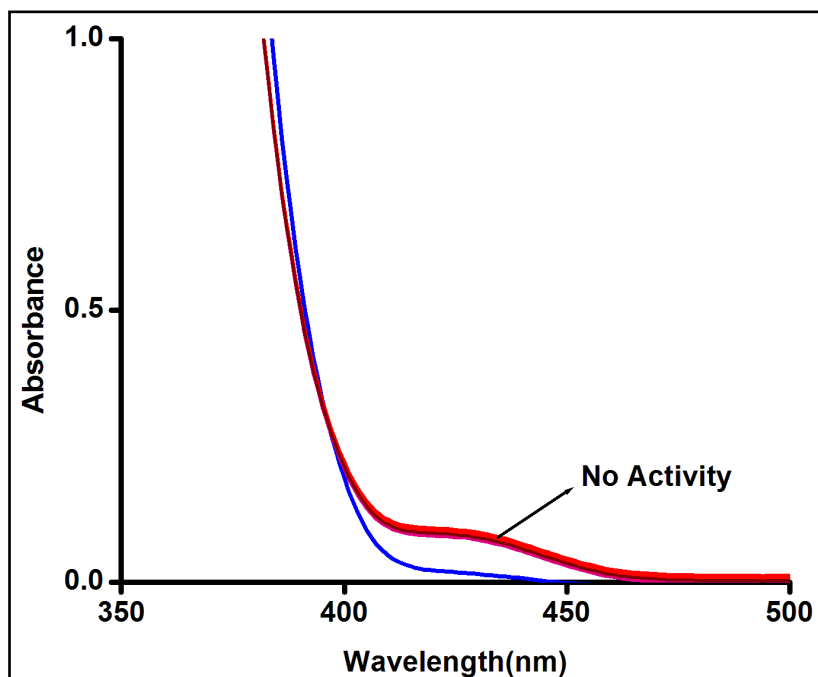

**Fig. S11** Controlled experiment of Phosphatase activity for  $[Cu(ClO_4)_2]$  in 97.5% DMF- $H_2O$  mixture .

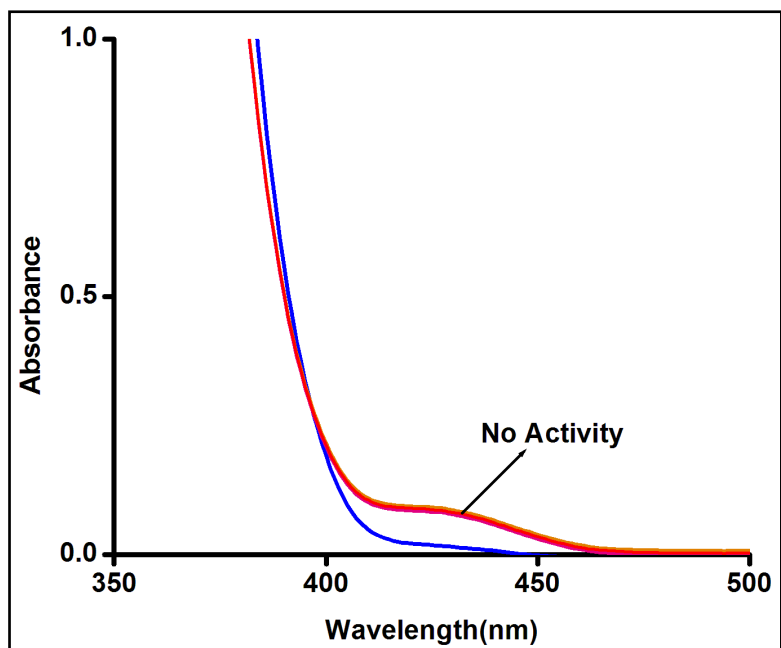

**Fig. S12** Controlled experiment of Phosphatase activity for [Cu(NO<sub>3</sub>)<sub>2</sub>] in 97.5% DMF-H<sub>2</sub>O mixture .

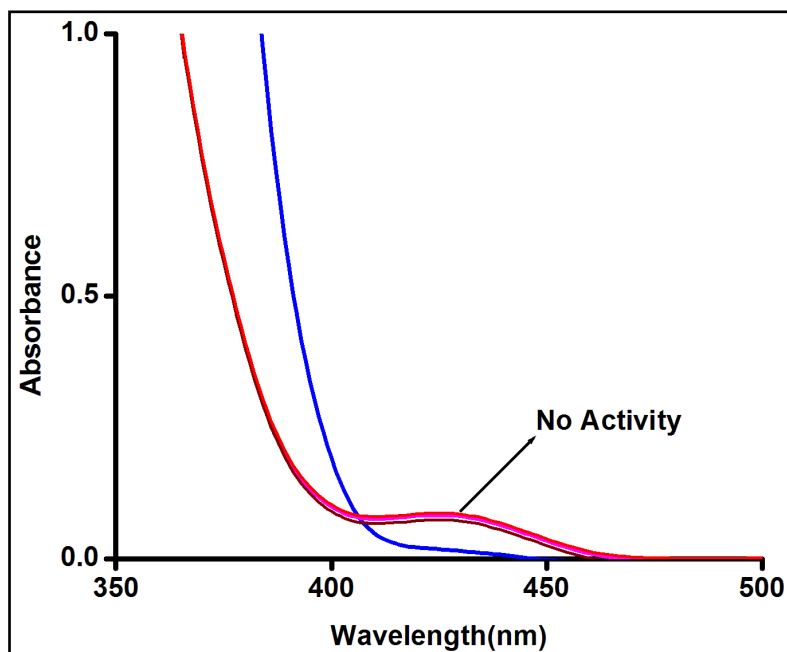

**Fig. S13** Controlled experiment of Phosphatase activity for [Cu(OAc)<sub>2</sub>] in 97.5% DMF-H<sub>2</sub>O mixture .

**Table S3** First-order rate parameters for phosphatase activity as obtained by the non linear treatment of Michaelis-Menten treatment of complexes **1**, **2** and **3**

| Complex   | $V_{\max}$ ( $M s^{-1}$ ) | $K_M$ (M)             | $k_{cat}$ ( $s^{-1}$ ) | $k_{cat}/K_M(M^{-1} s^{-1})$ | Std. Error            |
|-----------|---------------------------|-----------------------|------------------------|------------------------------|-----------------------|
| Complex 1 | $4.526 \times 10^{-4}$    | $1.43 \times 10^{-3}$ | 9.052                  | $6.336 \times 10^3$          | $3.59 \times 10^{-5}$ |
| Complex 2 | $3.495 \times 10^{-4}$    | $1.11 \times 10^{-3}$ | 6.990                  | $6.297 \times 10^3$          | $5.49 \times 10^{-5}$ |
| Complex 3 | $1.570 \times 10^{-4}$    | $8.68 \times 10^{-4}$ | 3.14                   | $3.617 \times 10^3$          | $1.83 \times 10^{-5}$ |

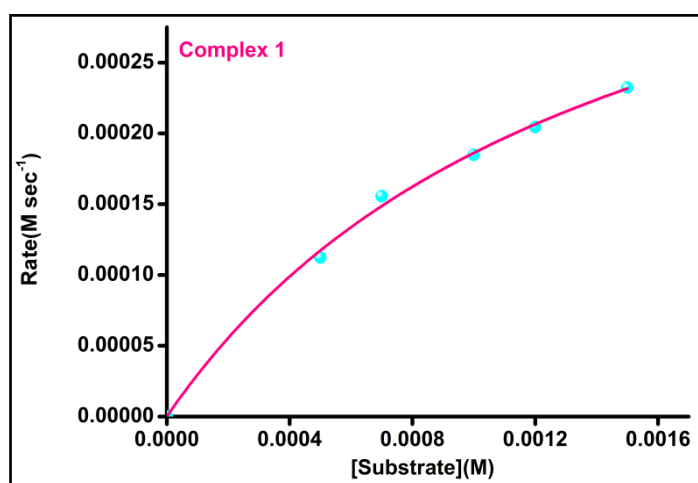

(a)

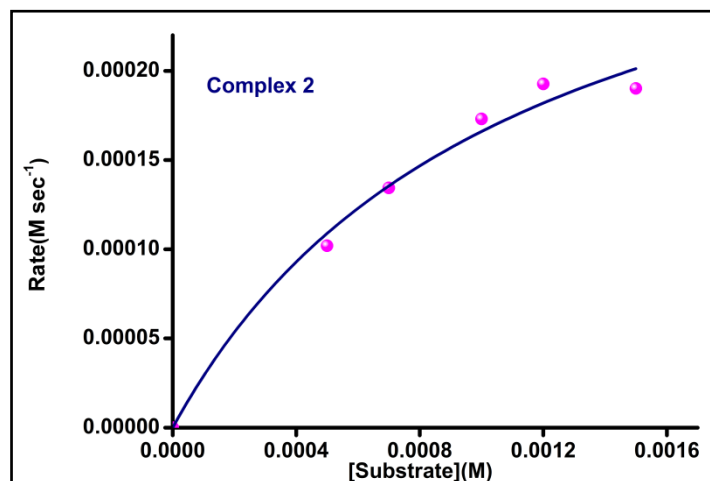

(b)

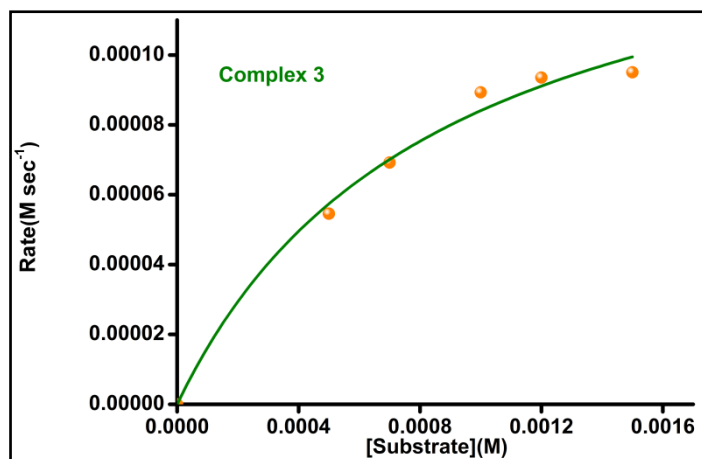

(c)

**Fig. S14** Plot of enzymatic kinetics of hydrolysis of 4-NPP for (a) complex **1**, (b) complex **2** and (c) complex **3**.

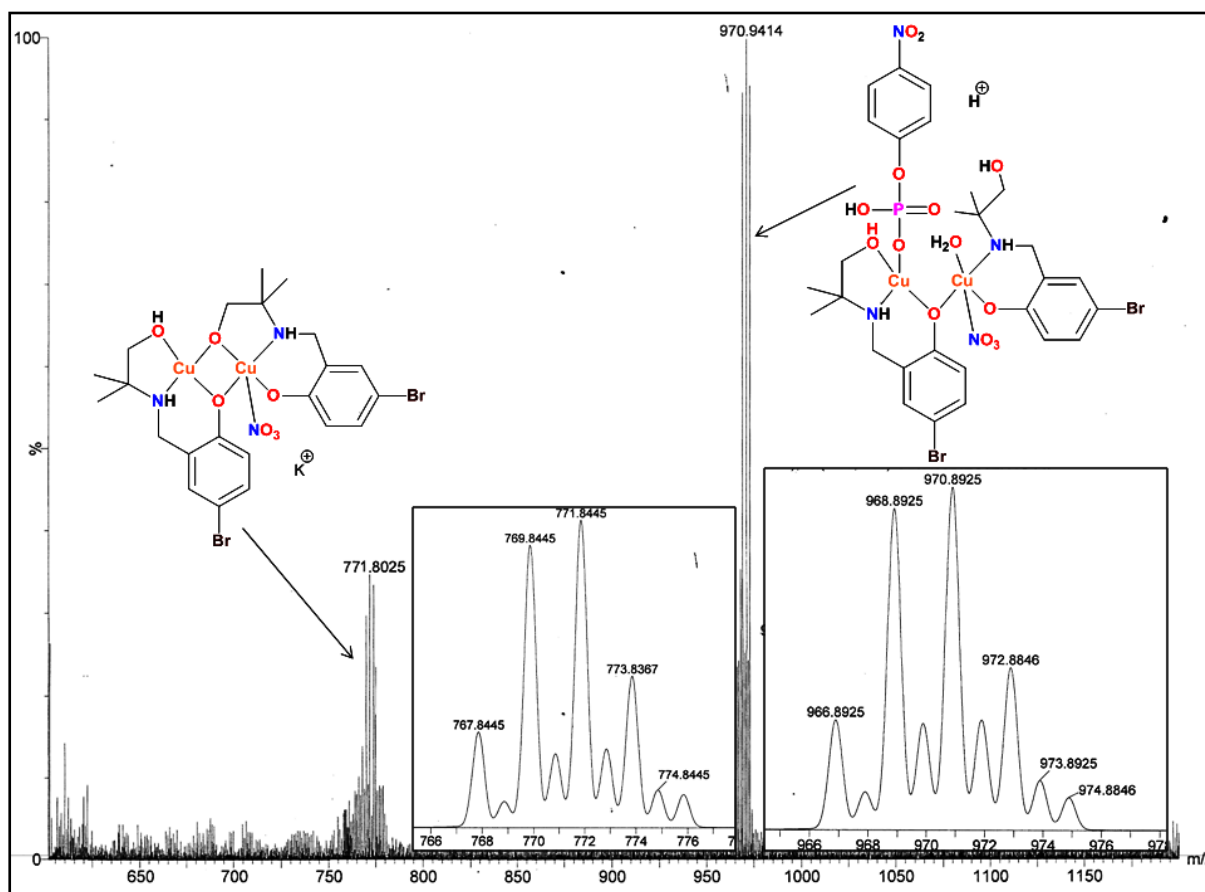

**Fig. S15** ESI-MS spectrum of reaction mixture of complex **2** and 4-NPP recorded in positive mode.

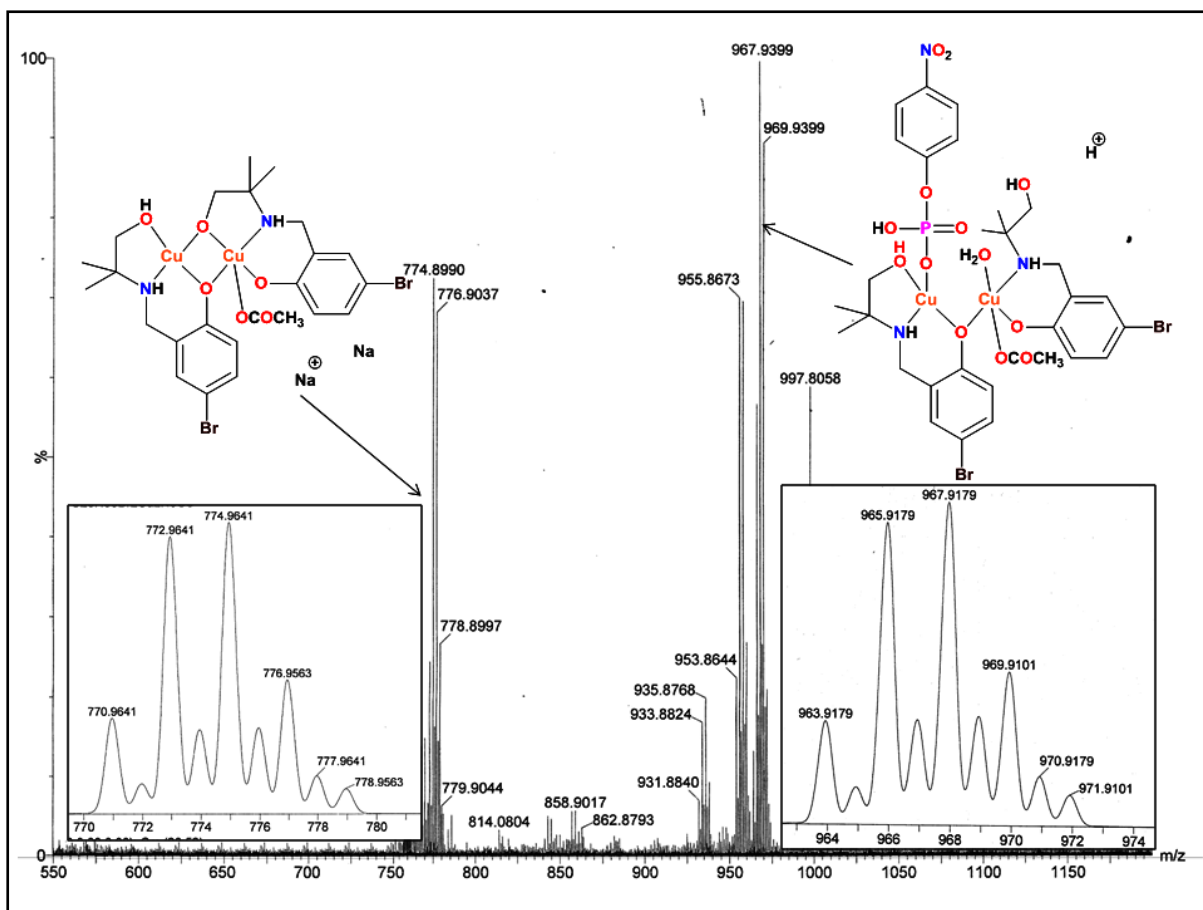

**Fig. S16** ESI-MS spectrum of reaction mixture of complex **3** and 4-NPP recorded in positive mode.

**Table S4** Relative Gibbs free energies in DMF solution for compounds involved in the reaction shown in the scheme 2 having symmetrically disposition of bischelate ligand L. The energy for initial complexes is arbitrarily taken to zero. All energies are in kJ/mol.

| Compounds                                                                                         | Relative Free Energies in DMF |                  |                 |                |
|---------------------------------------------------------------------------------------------------|-------------------------------|------------------|-----------------|----------------|
|                                                                                                   | Vacant                        | $\text{ClO}_4^-$ | $\text{NO}_3^-$ | $\text{AcO}^-$ |
| $[\text{Cu}_2\text{L}_2] (\text{As}) + \text{HPO}_4\text{Ar}^- + \text{H}_2\text{O}$              | 0.0                           | 0.0              | 0.0             | 0.0            |
| $[\text{Cu}_2\text{L}_2(\text{HPO}_4\text{Ar})]^- (\text{Bs}) + \text{H}_2\text{O}$               | -42.1                         | -50.6            | -43.1           | -39.5          |
| $[\text{Cu}_2\text{L}_2(\text{HPO}_4\text{Ar})(\text{H}_2\text{O})]^- (\text{Cs})$                | -85.6                         | -101.2           | -97.0           | -93.0          |
| $[\text{Cu}_2\text{L}_2(\text{H}_2\text{PO}_4)]^- (\text{Ds}) + \text{HOAr}$                      | -74.3                         | -70.6            | -66.1           | -72.4          |
| $[\text{Cu}_2\text{L}_2(\text{H}_2\text{O})] (\text{Es}) + \text{H}_2\text{PO}_4^- + \text{HOAr}$ | -27.1                         | -37.2            | -36.3           | -34.9          |

Ar =  $-\text{C}_6\text{H}_4\text{NO}_2$ .

**Table S5** Main geometric parameters for the optimized binuclear structures. Distances in

Angstroms, Angles in Degrees.

| Compounds                                                               | Vacant      | ClO <sub>4</sub> <sup>-</sup> | NO <sub>3</sub> <sup>-</sup> | AcO <sup>-</sup> |
|-------------------------------------------------------------------------|-------------|-------------------------------|------------------------------|------------------|
| <b>[Cu<sub>2</sub>(L)<sub>2</sub>] (A)</b>                              |             |                               |                              |                  |
| Cu <sub>A</sub> ···Cu <sub>B</sub>                                      | 3.014       | 2.899                         | 2.851                        | 2.875            |
| Cu <sub>A</sub> - μ -O <sub>Alk</sub>                                   | 1.929       | 1.947                         | 1.958                        | 1.965            |
| Cu <sub>A</sub> - μ -O <sub>Ar</sub>                                    | 2.028       | 2.021                         | 2.038                        | 1.998            |
| Cu <sub>A</sub> -O <sub>Ar</sub>                                        | 1.886       | 1.911                         | 1.915                        | 1.938            |
| Cu <sub>A</sub> -N                                                      | 2.086       | 2.087                         | 2.090                        | 2.118            |
| Cu <sub>A</sub> -O <sub>X</sub>                                         | <i>n.a.</i> | 2.718                         | 2.492                        | 2.511            |
| Cu <sub>B</sub> - μ -O <sub>Alk</sub>                                   | 1.958       | 1.982                         | 1.988                        | 1.993            |
| Cu <sub>B</sub> - μ -O <sub>Ar</sub>                                    | 2.008       | 2.050                         | 2.065                        | 2.330            |
| Cu <sub>B</sub> -O <sub>Alk</sub>                                       | 1.874       | 1.898                         | 1.905                        | 1.924            |
| Cu <sub>B</sub> -N                                                      | 2.062       | 2.043                         | 2.037                        | 2.048            |
| Cu <sub>B</sub> -O <sub>X</sub>                                         | <i>n.a.</i> | 2.588                         | 2.432                        | 2.131            |
| $\theta$                                                                | 161.9°      | 143.0°                        | 136.8°                       | 129.8°           |
| <b>[Cu<sub>2</sub>L<sub>2</sub>(HPO<sub>4</sub>Ar)]<sup>-</sup> (B)</b> |             |                               |                              |                  |
| Cu <sub>A</sub> ···Cu <sub>B</sub>                                      | 3.066       | 3.051                         | 3.009                        | 3.000            |
| Cu <sub>A</sub> - μ -O <sub>Alk</sub>                                   | 2.012       | 2.011                         | 2.007                        | 2.005            |
| Cu <sub>A</sub> - μ -O <sub>Ar</sub>                                    | 2.094       | 2.091                         | 2.089                        | 2.065            |
| Cu <sub>A</sub> -O <sub>Ar</sub>                                        | 1.923       | 1.936                         | 1.939                        | 1.945            |
| Cu <sub>A</sub> -N                                                      | 2.132       | 2.113                         | 2.113                        | 2.126            |
| Cu <sub>A</sub> -O <sub>P</sub>                                         | 2.168       | 2.185                         | 2.208                        | 2.216            |
| Cu <sub>B</sub> - μ -O <sub>Alk</sub>                                   | 2.001       | 2.002                         | 2.007                        | 2.018            |
| Cu <sub>B</sub> - μ -O <sub>Ar</sub>                                    | 1.974       | 2.013                         | 2.030                        | 2.075            |
| Cu <sub>B</sub> -O <sub>Alk</sub>                                       | 1.880       | 1.902                         | 1.924                        | 1.926            |
| Cu <sub>B</sub> -N                                                      | 2.084       | 2.060                         | 2.051                        | 2.056            |
| Cu <sub>B</sub> -O <sub>X</sub>                                         | <i>n.a.</i> | 2.564                         | 2.386                        | 2.289            |
| $\theta$                                                                | 175.9°      | 159.2°                        | 151.6°                       | 147.1°           |

|                                                                                      |             |        |        |        |
|--------------------------------------------------------------------------------------|-------------|--------|--------|--------|
| $[\text{Cu}_2\text{L}_2(\text{HPO}_4\text{Ar})(\text{H}_2\text{O})]^-$ (C)           |             |        |        |        |
| $\text{Cu}_A \cdots \text{Cu}_B$                                                     | 3.066       | 3.033  | 2.984  | 2.974  |
| $\text{Cu}_A - \mu - \text{O}_{\text{Alk}}$                                          | 2.029       | 2.020  | 2.023  | 2.023  |
| $\text{Cu}_A - \mu - \text{O}_{\text{Ar}}$                                           | 2.101       | 2.081  | 2.069  | 2.044  |
| $\text{Cu}_A - \text{O}_{\text{Ar}}$                                                 | 1.923       | 1.928  | 1.932  | 1.944  |
| $\text{Cu}_A - \text{N}$                                                             | 2.138       | 2.111  | 2.108  | 2.123  |
| $\text{Cu}_A - \text{O}_P$                                                           | 2.148       | 2.213  | 2.233  | 2.240  |
| $\text{Cu}_B - \mu - \text{O}_{\text{Alk}}$                                          | 2.025       | 2.010  | 2.013  | 2.018  |
| $\text{Cu}_B - \mu - \text{O}_{\text{Ar}}$                                           | 1.963       | 1.991  | 2.020  | 2.082  |
| $\text{Cu}_B - \text{O}_{\text{Alk}}$                                                | 1.914       | 1.926  | 1.940  | 1.957  |
| $\text{Cu}_B - \text{N}$                                                             | 2.075       | 2.036  | 2.029  | 2.026  |
| $\text{Cu}_B - \text{O}_X$                                                           | <i>n.a.</i> | 2.761  | 2.403  | 2.284  |
| $\text{Cu}_B \cdots \text{O}_W$                                                      | 2.437       | 3.023  | 3.136  | 3.332  |
| $\theta$                                                                             | 165.0°      | 157.9° | 148.7° | 143.3° |
| $[\text{Cu}_2\text{L}_2(\text{H}_2\text{O})(\text{HPO}_4\text{Ar})]^-$ (C1)          |             |        |        |        |
| $\text{Cu}_A \cdots \text{Cu}_B$                                                     | 3.694       | 3.631  | 3.651  | 3.669  |
| $\text{Cu}_A - \mu - \text{O}_{\text{Alk}}$                                          | 2.062       | 1.999  | 1.993  | 1.990  |
| $\text{Cu}_A - \text{O}_W$                                                           | 2.036       | 2.039  | 2.036  | 2.031  |
| $\text{Cu}_A - \text{O}_{\text{Ar}}$                                                 | 1.947       | 1.962  | 1.966  | 1.968  |
| $\text{Cu}_A - \text{N}$                                                             | 2.094       | 2.092  | 2.091  | 2.094  |
| $\text{Cu}_A - \text{O}_P$                                                           | 2.254       | 2.293  | 2.303  | 2.312  |
| $\text{Cu}_B - \mu - \text{O}_{\text{Alk}}$                                          | 1.949       | 1.958  | 1.969  | 1.980  |
| $\text{Cu}_B - \text{O}_{\text{Ar}}$                                                 | 1.932       | 1.951  | 2.008  | 2.018  |
| $\text{Cu}_B - \text{O}_{\text{Alk}}$                                                | 1.954       | 1.991  | 1.991  | 2.034  |
| $\text{Cu}_B - \text{N}$                                                             | 2.108       | 2.074  | 2.074  | 2.082  |
| $\text{Cu}_B - \text{O}_X$                                                           | <i>n.a.</i> | 2.655  | 2.379  | 2.248  |
| $[\text{Cu}_2\text{L}(\text{LH})(\mu - \text{OH})(\text{HPO}_4\text{Ar})]^-$<br>(C2) |             |        |        |        |

|                                                                                               |             |        |        |        |
|-----------------------------------------------------------------------------------------------|-------------|--------|--------|--------|
| $\text{Cu}_A \cdots \text{Cu}_B$                                                              | 2.968       | 2.991  | 3.006  | 2.970  |
| $\text{Cu}_A - \mu - \text{O}_{\text{Alk}}$                                                   | 1.991       | 2.074  | 2.068  | 2.023  |
| $\text{Cu}_A - \mu - \text{OH}$                                                               | 2.054       | 1.930  | 1.924  | 1.973  |
| $\text{Cu}_A - \text{O}_{\text{Ar}}$                                                          | 1.945       | 1.981  | 1.984  | 1.961  |
| $\text{Cu}_A - \text{N}$                                                                      | 2.109       | 2.119  | 2.119  | 2.128  |
| $\text{Cu}_A - \text{O}_{\text{P}}$                                                           | 2.182       | 2.272  | 2.285  | 2.253  |
| $\text{Cu}_B - \mu - \text{O}_{\text{Alk}}$                                                   | 2.022       | 2.023  | 2.014  | 2.059  |
| $\text{Cu}_B - \mu - \text{OH}$                                                               | 1.951       | 2.282  | 2.329  | 2.007  |
| $\text{Cu}_B - \text{O}_{\text{Ar}}$                                                          | 1.917       | 1.956  | 1.995  | 2.250  |
| $\text{Cu}_B - \text{N}$                                                                      | 2.098       | 2.078  | 2.065  | 2.085  |
| $\text{Cu}_B - \text{O}_{\text{X}}$                                                           | <i>n.a.</i> | 2.721  | 2.397  | 2.250  |
| $\text{Cu}_B - \text{O}_{\text{Alk}}$                                                         | 3.316       | 2.107  | 2.157  | 2.756  |
| $\theta$                                                                                      | 158.9°      | 145.8° | 144.7° | 156.3° |
| <hr/>                                                                                         |             |        |        |        |
| $[\text{Cu}_2\text{L}(\text{LH})(\text{HO} \cdots \text{HPO}_3 \cdots \text{OAr})]^-$<br>(TS) |             |        |        |        |
| $\text{Cu}_A \cdots \text{Cu}_B$                                                              | 3.204       | 3.071  | 3.100  | 3.174  |
| $\text{Cu}_A - \mu - \text{O}_{\text{Alk}}$                                                   | 2.272       | 2.057  | 2.057  | 2.064  |
| $\text{Cu}_A - \text{OH}$                                                                     | 2.077       | 1.939  | 1.932  | 1.923  |
| $\text{Cu}_A - \text{O}_{\text{Ar}}$                                                          | 1.952       | 1.996  | 2.002  | 2.009  |
| $\text{Cu}_A - \text{N}$                                                                      | 2.112       | 2.081  | 2.086  | 2.092  |
| $\text{Cu}_A - \text{O}_{\text{P}}$                                                           | 1.983       | 2.245  | 2.261  | 2.273  |
| $\text{Cu}_B - \mu - \text{O}_{\text{Alk}}$                                                   | 1.892       | 1.936  | 1.942  | 1.924  |
| $\text{Cu}_B - \text{O}_{\text{Ar}}$                                                          | 1.926       | 1.961  | 1.985  | 1.920  |
| $\text{Cu}_B - \text{O}_{\text{Alk}}$                                                         | 2.065       | 2.100  | 2.129  | 2.168  |
| $\text{Cu}_B - \text{N}$                                                                      | 2.086       | 2.075  | 2.069  | 2.077  |
| $\text{Cu}_B - \text{O}_{\text{X}}$                                                           | <i>n.a.</i> | 2.496  | 2.312  | 2.190  |
| $\text{P} \cdots \text{OH}$                                                                   | 1.796       | 2.286  | 2.338  | 2.379  |
| $\text{P} \cdots \text{OAr}$                                                                  | 2.271       | 1.872  | 1.863  | 1.858  |



|                                                                                   |             |        |        |        |
|-----------------------------------------------------------------------------------|-------------|--------|--------|--------|
| <b>[Cu<sub>2</sub>L(LH)(H<sub>2</sub>PO<sub>4</sub>-OAr)]<sup>-</sup> (C3)</b>    |             |        |        |        |
| Cu <sub>A</sub> ···Cu <sub>B</sub>                                                | 2.990       | 3.092  | 3.105  | 3.119  |
| Cu <sub>A</sub> - μ -O <sub>Alk</sub>                                             | 1.993       | 1.986  | 1.987  | 1.997  |
| Cu <sub>A</sub> - μ -O <sub>Ar</sub>                                              | 2.151       | 2.165  | 2.161  | 2.105  |
| Cu <sub>A</sub> -O <sub>Ar</sub>                                                  | 1.919       | 1.932  | 1.939  | 1.953  |
| Cu <sub>A</sub> -N                                                                | 2.096       | 2.133  | 2.129  | 2.127  |
| Cu <sub>A</sub> -O <sub>P</sub>                                                   | 2.150       | 2.099  | 2.095  | 2.117  |
| Cu <sub>B</sub> - μ -O <sub>Alk</sub>                                             | 1.920       | 1.911  | 1.912  | 1.920  |
| Cu <sub>B</sub> - μ -O <sub>Ar</sub>                                              | 2.038       | 2.066  | 2.103  | 2.196  |
| Cu <sub>B</sub> -O <sub>Alk</sub>                                                 | 1.907       | 2.107  | 2.159  | 2.142  |
| Cu <sub>B</sub> -N                                                                | 2.068       | 2.057  | 2.055  | 2.060  |
| Cu <sub>B</sub> -O <sub>X</sub>                                                   | <i>n.a.</i> | 2.184  | 2.097  | 2.020  |
| <i>θ</i>                                                                          | 150.1°      | 176.5° | 179.1° | 178.6° |
| <b>[Cu<sub>2</sub>L<sub>2</sub>(H<sub>2</sub>PO<sub>4</sub>)]<sup>-</sup> (D)</b> |             |        |        |        |
| Cu <sub>A</sub> ···Cu <sub>B</sub>                                                | 3.245       | 3.130  | 3.070  | 3.046  |
| Cu <sub>A</sub> - μ -O <sub>Alk</sub>                                             | 2.001       | 1.998  | 1.995  | 1.997  |
| Cu <sub>A</sub> - μ -O <sub>Ar</sub>                                              | 2.513       | 2.289  | 2.246  | 2.172  |
| Cu <sub>A</sub> -O <sub>Ar</sub>                                                  | 1.930       | 1.936  | 1.938  | 1.952  |
| Cu <sub>A</sub> -N                                                                | 2.148       | 2.132  | 2.132  | 2.140  |
| Cu <sub>A</sub> -O <sub>P</sub>                                                   | 1.973       | 2.043  | 2.075  | 2.102  |
| Cu <sub>B</sub> - μ -O <sub>Alk</sub>                                             | 2.006       | 1.990  | 1.991  | 1.994  |
| Cu <sub>B</sub> - μ -O <sub>Ar</sub>                                              | 1.971       | 2.010  | 2.047  | 2.129  |
| Cu <sub>B</sub> -O <sub>Alk</sub>                                                 | 1.884       | 1.902  | 1.919  | 1.935  |
| Cu <sub>B</sub> -N                                                                | 2.107       | 2.069  | 2.063  | 2.066  |
| Cu <sub>B</sub> -O <sub>X</sub>                                                   | <i>n.a.</i> | 2.716  | 2.405  | 2.257  |
| <i>θ</i>                                                                          | 172.3°      | 162.7° | 153.9° | 148.5° |
| <b>[Cu<sub>2</sub>L<sub>2</sub>(H<sub>2</sub>O)] (E)</b>                          |             |        |        |        |
| Cu <sub>A</sub> ···Cu <sub>B</sub>                                                | 3.009       | 2.894  | 2.847  | 2.828  |

|                                         |             |        |        |        |
|-----------------------------------------|-------------|--------|--------|--------|
| $\text{Cu}_A-\mu-\text{O}_{\text{Alk}}$ | 1.939       | 1.955  | 1.964  | 1.964  |
| $\text{Cu}_A-\mu-\text{O}_{\text{Ar}}$  | 2.037       | 2.023  | 2.035  | 2.023  |
| $\text{Cu}_A-\text{O}_{\text{Ar}}$      | 1.882       | 1.906  | 1.909  | 1.924  |
| $\text{Cu}_A-\text{N}$                  | 2.084       | 2.082  | 2.084  | 2.106  |
| $\text{Cu}_A-\text{O}_X$                | <i>n.a.</i> | 2.732  | 2.537  | 2.242  |
| $\text{Cu}_B-\mu-\text{O}_{\text{Alk}}$ | 1.964       | 1.988  | 1.992  | 1.975  |
| $\text{Cu}_B-\mu-\text{O}_{\text{Ar}}$  | 1.991       | 2.042  | 2.064  | 2.144  |
| $\text{Cu}_B-\text{O}_{\text{Alk}}$     | 1.893       | 1.919  | 1.928  | 1.960  |
| $\text{Cu}_B-\text{N}$                  | 2.055       | 2.042  | 2.032  | 2.045  |
| $\text{Cu}_B-\text{O}_X$                | <i>n.a.</i> | 2.455  | 2.345  | 2.465  |
| $\text{Cu}_B\cdots\text{O}_W$           | 3.392       | 3.399  | 3.391  | 3.491  |
| $\theta$                                | 159.7°      | 141.5° | 135.2° | 129.4° |

Ar =  $-\text{C}_6\text{H}_4\text{NO}_2$ . The  $\theta$  value is defined as the bent angle between  $\text{CuO}_2$  planes in the  $\text{Cu}_2\text{O}_2$  ring.

**Table S6** Continuous Shape Measures (CSM) for copper atoms in the computed geometries across the proposed pathway.

| Compounds                                                               | Vacant                                            | $\text{ClO}_4^-$                                                             | $\text{NO}_3^-$                                                              | $\text{AcO}^-$                                                               |
|-------------------------------------------------------------------------|---------------------------------------------------|------------------------------------------------------------------------------|------------------------------------------------------------------------------|------------------------------------------------------------------------------|
| <b>[Cu<sub>2</sub>(L)<sub>2</sub>] (A)</b>                              |                                                   |                                                                              |                                                                              |                                                                              |
| $\text{Cu}_A$                                                           | $S_{\text{SQ}} = 1.01$                            | $S_{\text{SQ}} = 0.73$<br>$S_{\text{SPY}} = 3.09$                            | $S_{\text{SQ}} = 0.67$<br>$S_{\text{SPY}} = 2.35$                            | $S_{\text{SQ}} = 0.64$<br>$S_{\text{SPY}} = 2.81$                            |
| $\text{Cu}_B$                                                           | $S_{\text{SQ}} = 0.70$                            | $S_{\text{SQ}} = 1.70$<br>$S_{\text{SPY}} = 3.07$<br>$S_{\text{TBP}} = 4.10$ | $S_{\text{SQ}} = 1.98$<br>$S_{\text{SPY}} = 3.30$<br>$S_{\text{TBP}} = 3.84$ | $S_{\text{TBP}} = 3.66$<br>$S_{\text{SPY}} = 4.71$<br>$S_{\text{SQ}} = 4.60$ |
| <b>[Cu<sub>2</sub>L<sub>2</sub>(HPO<sub>4</sub>Ar)]<sup>-</sup> (B)</b> |                                                   |                                                                              |                                                                              |                                                                              |
| $\text{Cu}_A$                                                           | $S_{\text{SPY}} = 0.57$<br>$S_{\text{SQ}} = 1.40$ | $S_{\text{SPY}} = 0.85$<br>$S_{\text{SQ}} = 1.73$<br>$S_{\text{TBP}} = 3.74$ | $S_{\text{SPY}} = 0.73$<br>$S_{\text{SQ}} = 1.41$<br>$S_{\text{TBP}} = 4.15$ | $S_{\text{SPY}} = 0.68$<br>$S_{\text{SQ}} = 1.28$<br>$S_{\text{TBP}} = 4.64$ |
| $\text{Cu}_B$                                                           | $S_{\text{SQ}} = 1.11$                            | $S_{\text{SQ}} = 1.04$<br>$S_{\text{SPY}} = 1.40$<br>$S_{\text{TBP}} = 3.63$ | $S_{\text{SQ}} = 1.24$<br>$S_{\text{SPY}} = 1.51$<br>$S_{\text{TBP}} = 3.40$ | $S_{\text{SPY}} = 1.38$<br>$S_{\text{SQ}} = 1.41$<br>$S_{\text{TBP}} = 3.54$ |

|                                                                                        |                         |                         |                         |                         |
|----------------------------------------------------------------------------------------|-------------------------|-------------------------|-------------------------|-------------------------|
| $[\text{Cu}_2\text{L}_2(\text{HPO}_4\text{Ar})(\text{H}_2\text{O})]^-$ (C)             |                         |                         |                         |                         |
| $\text{Cu}_A$                                                                          | $S_{\text{SPY}} = 0.51$ | $S_{\text{SPY}} = 0.80$ | $S_{\text{SPY}} = 0.64$ | $S_{\text{SPY}} = 0.63$ |
|                                                                                        | $S_{\text{SQ}} = 1.36$  | $S_{\text{SQ}} = 1.44$  | $S_{\text{SQ}} = 1.09$  | $S_{\text{SQ}} = 0.97$  |
| $\text{Cu}_B$                                                                          | $S_{\text{SQ}} = 1.21$  | $S_{\text{SQ}} = 1.73$  | $S_{\text{SQ}} = 1.91$  | $S_{\text{SPY}} = 2.45$ |
|                                                                                        | $S_{\text{SPY}} = 2.02$ | $S_{\text{SPY}} = 2.63$ | $S_{\text{SPY}} = 2.29$ | $S_{\text{SQ}} = 2.45$  |
|                                                                                        |                         | $S_{\text{TBP}} = 3.33$ | $S_{\text{TBP}} = 2.92$ | $S_{\text{TBP}} = 2.86$ |
| $[\text{Cu}_2\text{L}_2(\text{H}_2\text{O})(\text{HPO}_4\text{Ar})]^-$ (C1)            |                         |                         |                         |                         |
| $\text{Cu}_A$                                                                          | $S_{\text{SPY}} = 1.71$ | $S_{\text{SPY}} = 1.77$ | $S_{\text{TBP}} = 1.76$ | $S_{\text{TBP}} = 1.83$ |
|                                                                                        | $S_{\text{TBP}} = 1.77$ | $S_{\text{TBP}} = 1.87$ | $S_{\text{SPY}} = 1.96$ | $S_{\text{SPY}} = 1.92$ |
| $\text{Cu}_B$                                                                          | $S_{\text{SQ}} = 2.28$  | $S_{\text{SQ}} = 2.15$  | $S_{\text{SQ}} = 2.35$  | $S_{\text{SQ}} = 2.27$  |
|                                                                                        |                         | $S_{\text{SQ}} = 1.90$  | $S_{\text{SPY}} = 1.84$ | $S_{\text{TBP}} = 1.72$ |
|                                                                                        | $S_{\text{SQ}} = 0.33$  | $S_{\text{SPY}} = 2.34$ | $S_{\text{SQ}} = 2.01$  | $S_{\text{SPY}} = 2.20$ |
|                                                                                        |                         | $S_{\text{TBP}} = 2.66$ | $S_{\text{TBP}} = 2.02$ | $S_{\text{SQ}} = 2.92$  |
| $[\text{Cu}_2\text{L}(\text{LH})(\mu\text{-OH})(\text{HPO}_4\text{Ar})]^-$ (C2)        |                         |                         |                         |                         |
| $\text{Cu}_A$                                                                          | $S_{\text{SPY}} = 0.55$ | $S_{\text{SPY}} = 0.30$ | $S_{\text{SPY}} = 0.32$ | $S_{\text{SPY}} = 0.59$ |
|                                                                                        | $S_{\text{SQ}} = 1.33$  | $S_{\text{SQ}} = 0.79$  | $S_{\text{SQ}} = 0.76$  | $S_{\text{SQ}} = 1.33$  |
| $\text{Cu}_B$                                                                          | $S_{\text{TBP}} = 4.38$ | $S_{\text{TBP}} = 5.32$ | $S_{\text{TBP}} = 5.23$ | $S_{\text{TBP}} = 3.87$ |
|                                                                                        |                         | $S_{\text{SPY}} = 1.32$ | $S_{\text{SPY}} = 0.96$ | $S_{\text{SPY}} = 1.15$ |
|                                                                                        | $S_{\text{SQ}} = 6.37$  | $S_{\text{OCT}} = 1.87$ | $S_{\text{OCT}} = 1.22$ | $S_{\text{OCT}} = 2.76$ |
| $[\text{Cu}_2\text{L}(\text{LH})(\text{HO}\cdots\text{HPO}_3\cdots\text{OAr})]^-$ (TS) |                         |                         |                         |                         |
| $\text{Cu}_A$                                                                          | $S_{\text{SQ}} = 1.95$  | $S_{\text{SQ}} = 1.86$  | $S_{\text{SQ}} = 1.86$  | $S_{\text{SQ}} = 1.93$  |
|                                                                                        | $S_{\text{SPY}} = 2.53$ | $S_{\text{SPY}} = 2.05$ | $S_{\text{SPY}} = 2.01$ | $S_{\text{SPY}} = 2.03$ |
| $\text{Cu}_B$                                                                          | $S_{\text{TBP}} = 4.19$ | $S_{\text{TBP}} = 2.73$ | $S_{\text{TBP}} = 2.67$ | $S_{\text{TBP}} = 2.57$ |
|                                                                                        |                         | $S_{\text{SQ}} = 0.42$  | $S_{\text{SPY}} = 0.49$ | $S_{\text{SPY}} = 0.66$ |
|                                                                                        | $S_{\text{SQ}} = 0.57$  | $S_{\text{SPY}} = 0.67$ | $S_{\text{SQ}} = 0.61$  | $S_{\text{SQ}} = 1.29$  |
| $[\text{Cu}_2\text{L}(\text{LH})(\text{H}_2\text{PO}_4\text{-OAr})]^-$ (C3)            |                         |                         |                         |                         |
| $\text{Cu}_A$                                                                          | $S_{\text{SPY}} = 1.76$ | $S_{\text{SPY}} = 0.66$ | $S_{\text{SPY}} = 0.69$ | $S_{\text{SPY}} = 0.77$ |

|                                                                                   |                         |                         |                         |                         |
|-----------------------------------------------------------------------------------|-------------------------|-------------------------|-------------------------|-------------------------|
|                                                                                   | $S_{\text{TBP}} = 2.47$ | $S_{\text{SQ}} = 1.54$  | $S_{\text{SQ}} = 1.56$  | $S_{\text{SQ}} = 1.45$  |
|                                                                                   | $S_{\text{SQ}} = 2.77$  | $S_{\text{TBP}} = 5.22$ | $S_{\text{TBP}} = 4.90$ | $S_{\text{TBP}} = 3.91$ |
| $\text{Cu}_\text{B}$                                                              | $S_{\text{SQ}} = 6.46$  | $S_{\text{TBP}} = 0.76$ | $S_{\text{TBP}} = 0.49$ | $S_{\text{TBP}} = 0.68$ |
|                                                                                   |                         | $S_{\text{SPY}} = 4.27$ | $S_{\text{SPY}} = 4.59$ | $S_{\text{SPY}} = 4.95$ |
| <b>[Cu<sub>2</sub>L<sub>2</sub>(H<sub>2</sub>PO<sub>4</sub>)]<sup>-</sup> (D)</b> |                         |                         |                         |                         |
|                                                                                   | $S_{\text{SPY}} = 2.57$ | $S_{\text{SPY}} = 1.19$ | $S_{\text{SPY}} = 0.89$ | $S_{\text{SPY}} = 0.69$ |
| $\text{Cu}_\text{A}$                                                              | $S_{\text{TBP}} = 4.09$ | $S_{\text{SQ}} = 2.45$  | $S_{\text{SQ}} = 1.90$  | $S_{\text{SQ}} = 1.50$  |
|                                                                                   | $S_{\text{SQ}} = 4.29$  | $S_{\text{TBP}} = 4.20$ | $S_{\text{TBP}} = 4.70$ | $S_{\text{TBP}} = 5.10$ |
|                                                                                   |                         | $S_{\text{SQ}} = 1.49$  | $S_{\text{SQ}} = 1.61$  | $S_{\text{SPY}} = 1.82$ |
| $\text{Cu}_\text{B}$                                                              | $S_{\text{SQ}} = 0.39$  | $S_{\text{SPY}} = 2.06$ | $S_{\text{SPY}} = 1.86$ | $S_{\text{SQ}} = 2.08$  |
|                                                                                   |                         | $S_{\text{TBP}} = 3.07$ | $S_{\text{TBP}} = 2.89$ | $S_{\text{TBP}} = 2.82$ |
| <b>[Cu<sub>2</sub>L<sub>2</sub>(H<sub>2</sub>O)] (E)</b>                          |                         |                         |                         |                         |
|                                                                                   |                         | $S_{\text{SQ}} = 0.75$  | $S_{\text{SQ}} = 0.67$  | $S_{\text{SQ}} = 0.74$  |
| $\text{Cu}_\text{A}$                                                              | $S_{\text{SQ}} = 0.99$  | $S_{\text{SPY}} = 3.29$ | $S_{\text{SPY}} = 2.56$ | $S_{\text{SPY}} = 2.40$ |
|                                                                                   |                         | $S_{\text{SQ}} = 1.36$  | $S_{\text{SQ}} = 1.64$  | $S_{\text{SQ}} = 2.25$  |
| $\text{Cu}_\text{B}$                                                              | $S_{\text{SQ}} = 0.63$  | $S_{\text{SPY}} = 2.41$ | $S_{\text{SPY}} = 2.62$ | $S_{\text{SPY}} = 2.94$ |
|                                                                                   |                         | $S_{\text{TBP}} = 4.25$ | $S_{\text{TBP}} = 3.92$ | $S_{\text{TBP}} = 3.98$ |

Continuous shape measures from ideal square-planar ( $S_{\text{SQ}}$ ), square-pyramidal ( $S_{\text{SPY}}$ ), trigonal-bipyramidal ( $S_{\text{TBP}}$ ), or octahedral ( $S_{\text{OCT}}$ ) geometries.

Ar = -C<sub>6</sub>H<sub>4</sub>NO<sub>2</sub>.

**Table S7** Crystallographic data and details of refinements for complexes **2** and **3**

|                   | <b>2</b> ·C <sub>2</sub> H <sub>5</sub> OH·0.5(H <sub>2</sub> O)                                 | <b>3</b> ·MeCN·H <sub>2</sub> O                                                                |
|-------------------|--------------------------------------------------------------------------------------------------|------------------------------------------------------------------------------------------------|
| CCDC Number       | 1835391                                                                                          | 1835392                                                                                        |
| empirical formula | C <sub>46</sub> H <sub>64</sub> Br <sub>4</sub> Cu <sub>4</sub> N <sub>6</sub> O <sub>15.5</sub> | C <sub>52</sub> H <sub>74</sub> Br <sub>4</sub> Cu <sub>4</sub> N <sub>6</sub> O <sub>14</sub> |
| Fw                | 1522.83                                                                                          | 1580.97                                                                                        |
| Crystal system    | Monoclinic                                                                                       | Monoclinic                                                                                     |
| space group       | <i>P</i> 2 <sub>1</sub> / <i>c</i>                                                               | <i>P</i> 2 <sub>1</sub> / <i>n</i>                                                             |
| <i>a</i> /Å       | 12.401(3)                                                                                        | 11.3423(10)                                                                                    |
| <i>b</i> /Å       | 19.901(6)                                                                                        | 11.3744(10)                                                                                    |
| <i>c</i> /Å       | 13.776(4)                                                                                        | 24.430(2)                                                                                      |

|                                             |               |               |
|---------------------------------------------|---------------|---------------|
| $\alpha /^\circ$                            | 90.0          | 90.0          |
| $\beta /^\circ$                             | 107.718(5)    | 100.142(3)    |
| $\gamma /^\circ$                            | 90.0          | 90.0          |
| $V/\text{\AA}^3$                            | 3238.5(16)    | 3102.5(5)     |
| Z                                           | 2             | 2             |
| $D_{\text{calcd}}/\text{mg m}^{-3}$         | 1.562         | 1.692         |
| $\mu$ (Mo-K $\alpha$ ) ( $\text{mm}^{-1}$ ) | 3.823         | 3.993         |
| F(000)                                      | 1524          | 1592          |
| $\theta$ range ( $^\circ$ )                 | 1.86-25.6     | 1.69 -24.13   |
| collected reflections                       | 15198         | 32079         |
| indep reflections                           | 5700          | 4926          |
| $R_{\text{int}}$                            | 0.086         | 0.081         |
| Obs reflcs [ $I > 2\sigma(I)$ ]             | 2963          | 3609          |
| Parameters                                  | 342           | 372           |
| $R1$ [ $I > 2\sigma(I)$ ]                   | 0.0621        | 0.0444        |
| $wR2$ [ $I > 2\sigma(I)$ ]                  | 0.1518        | 0.0977        |
| GOF on $F^2$                                | 0.973         | 1.014         |
| residuals ( $e \text{\AA}^{-3}$ )           | 1.183, -1.319 | 0.670, -0.422 |

CCDC 1835391-1835392 contain the supplementary crystallographic data for this paper. These data can be obtained free charge from the Cambridge Crystallographic Data Centre via [http://www.ccdc.cam.ac.uk/5 data\\_request/cif](http://www.ccdc.cam.ac.uk/5 data_request/cif).
